# Supplementary material for: Interferon-γ-induced upregulation of immunoproteasome subunit assembly overcomes bortezomib resistance in human hematological cell lines
Source: PubMed Central journal article supplement (PMC3896789; doi:10.1186/1756-8722-7-7), 2014-01-13

A

## 8226/WT

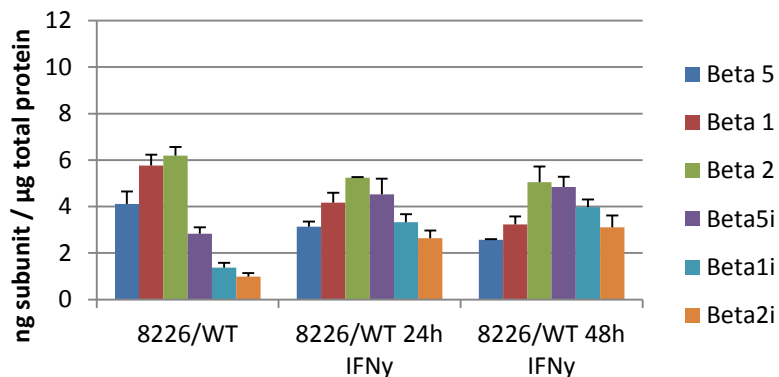

## 8226/BTZ100

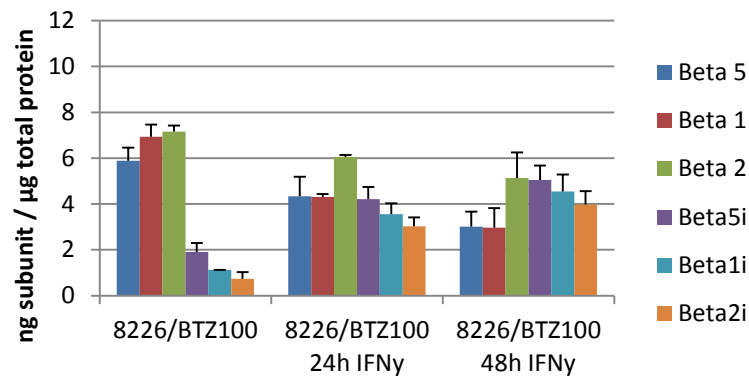

B

## THP1/WT

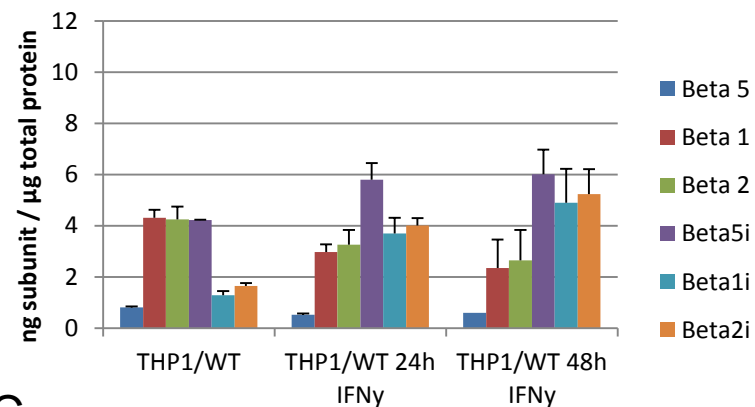

## THP1/BTZ200

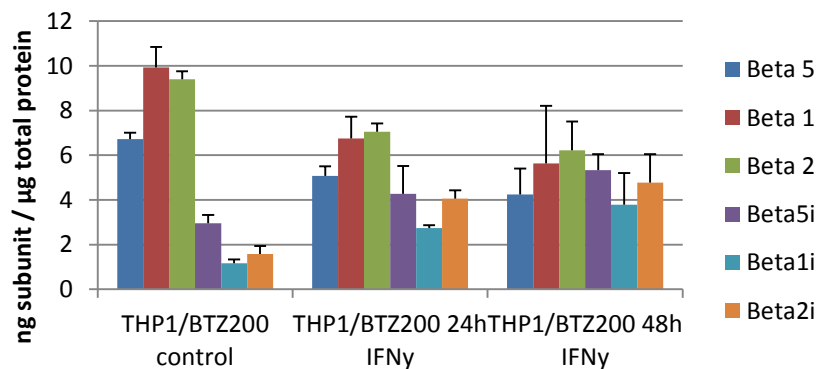

C

## CEM/WT

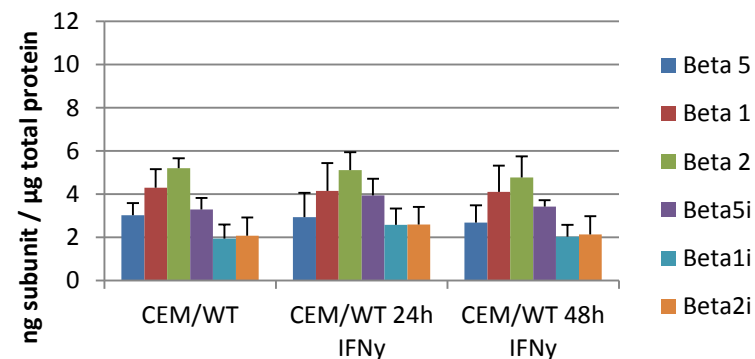

## CEM/BTZ200

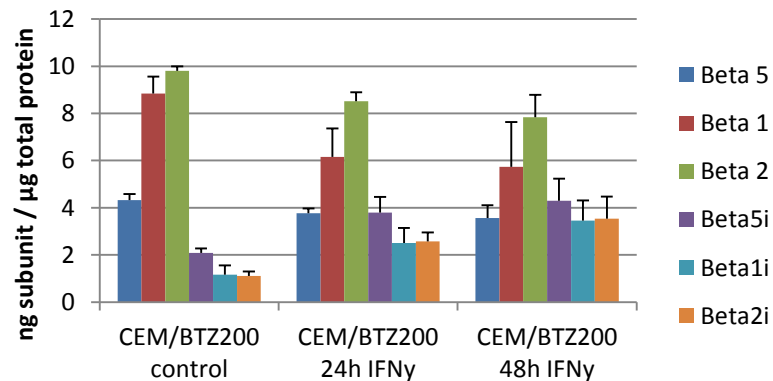

Supplement: 1756-8722-7-7-S2.pdf [file 1756-8722-7-7-S2.pdf]
