# Supplementary material for: Interferon-γ-induced upregulation of immunoproteasome subunit assembly overcomes bortezomib resistance in human hematological cell lines
Source: PubMed Central journal article supplement (PMC3896789; doi:10.1186/1756-8722-7-7), 2014-01-13
Supplement: 1756-8722-7-7-S5.pdf [file 1756-8722-7-7-S5.pdf]

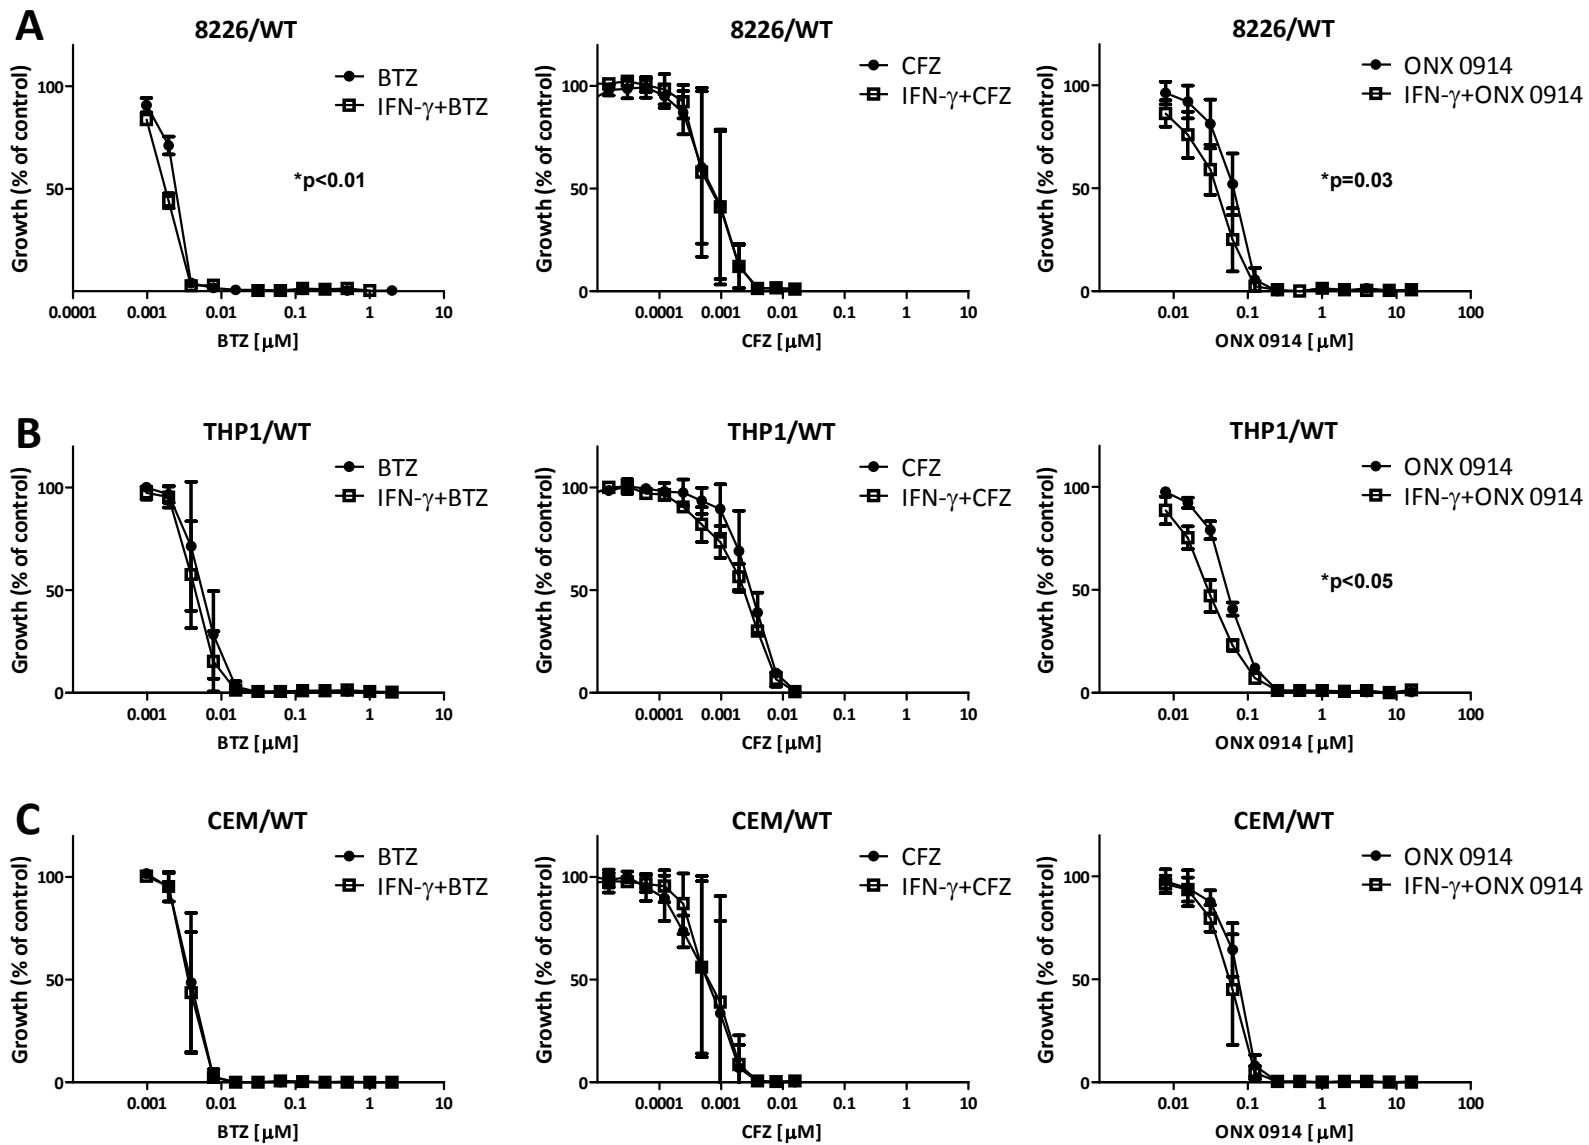

Figure S4
